# Supplementary material
Source: PubMed Central journal article supplement (PMC10460371)
Supplement: 40257_2023_788_MOESM1_ESM.pdf [file 40257_2023_788_MOESM1_ESM.pdf]

***American Journal of Clinical Dermatology***

**Efficacy and Safety of Apremilast for the Treatment of Japanese Patients With  
Palmoplantar Pustulosis: Results From a Phase 2, Randomized, Placebo-  
Controlled Study**

Tadashi Terui<sup>1</sup>; Yukari Okubo<sup>2</sup>; Satomi Kobayashi<sup>3</sup>; Shigetoshi Sano<sup>4</sup>; Akimichi  
Morita<sup>5</sup>; Shinichi Imafuku<sup>6</sup>; Yayoi Tada<sup>7</sup>; Masatoshi Abe<sup>8</sup>; Masafumi Yaguchi<sup>9</sup>; Natsuka  
Uehara<sup>9</sup>; Takahiro Handa<sup>9</sup>; Masayuki Tanaka<sup>9</sup>; Wendy Zhang<sup>10</sup>; Maria Paris<sup>10</sup>;  
Masamoto Murakami<sup>11</sup>

<sup>1</sup>Nihon University School of Medicine, Tokyo, Japan; <sup>2</sup>Tokyo Medical University, Tokyo, Japan; <sup>3</sup>Seibo International Catholic Hospital, Tokyo, Japan; <sup>4</sup>Kochi Medical School, Kochi University, Kochi, Japan; <sup>5</sup>Nagoya City University, Nagoya City, Japan; <sup>6</sup>Fukuoka University, Fukuoka, Japan; <sup>7</sup>Teikyo University, Tokyo, Japan; <sup>8</sup>Sapporo Skin Clinic, Sapporo, Japan; <sup>9</sup>Amgen K.K., Tokyo, Japan; <sup>10</sup>Amgen Inc., Thousand Oaks, CA, USA; <sup>11</sup>Ehime University Graduate School of Medicine, Ehime, Japan

**Corresponding author:**

Tadashi Terui, MD, PhD

Nihon University School of Medicine

30-1 Oyaguchikamicho, Itabashi City, Tokyo 173-8610, Japan

terui.tadashi@nihon-u.ac.jp

Online Resource 1. Study Design

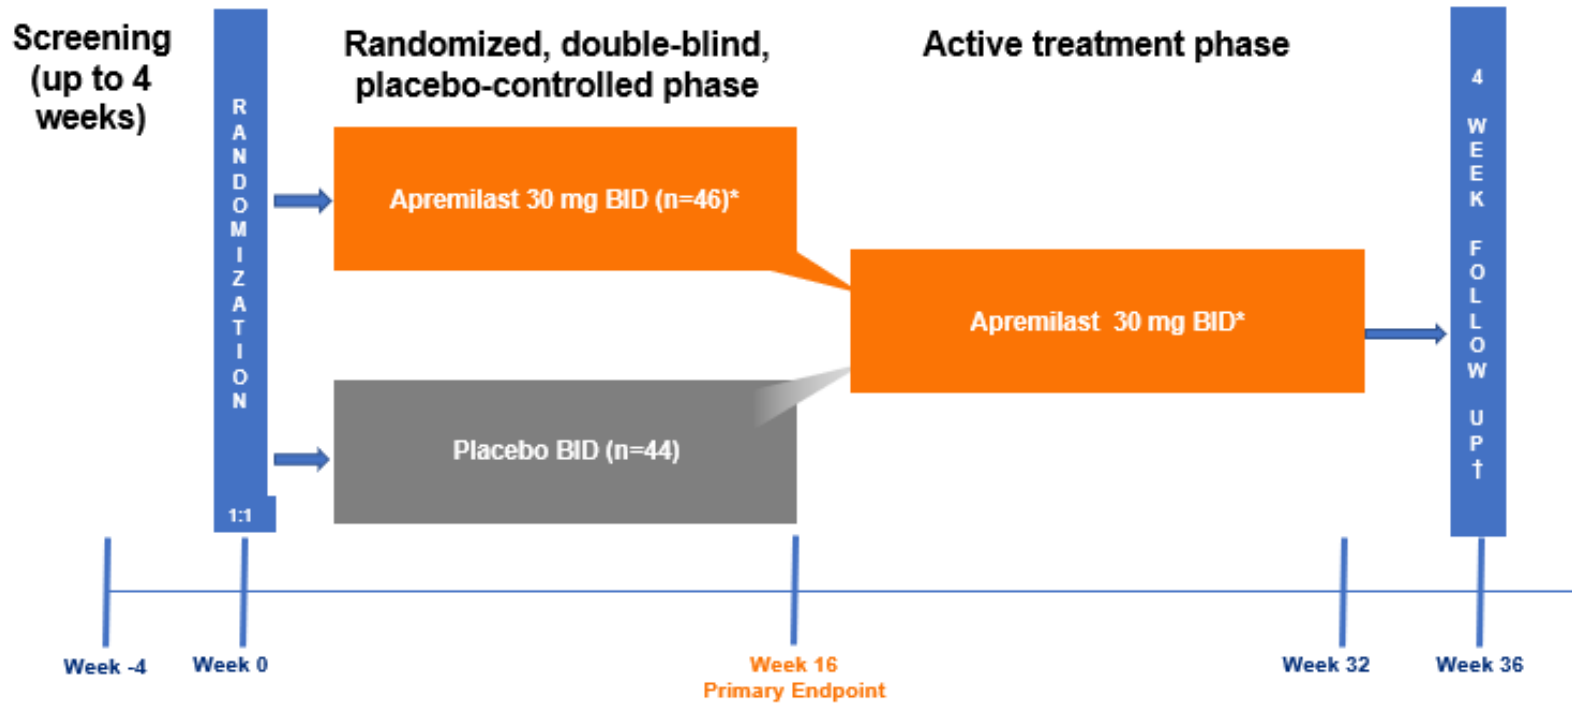

\*Apremilast dose was titrated over a 5-day period at Week 0 for patients initially randomized to apremilast and at Week 16 for patients switched from placebo to apremilast.

†Observational follow-up for all patients who completed the study or discontinued the study early.

**Online Resource 2. Patient Disposition**

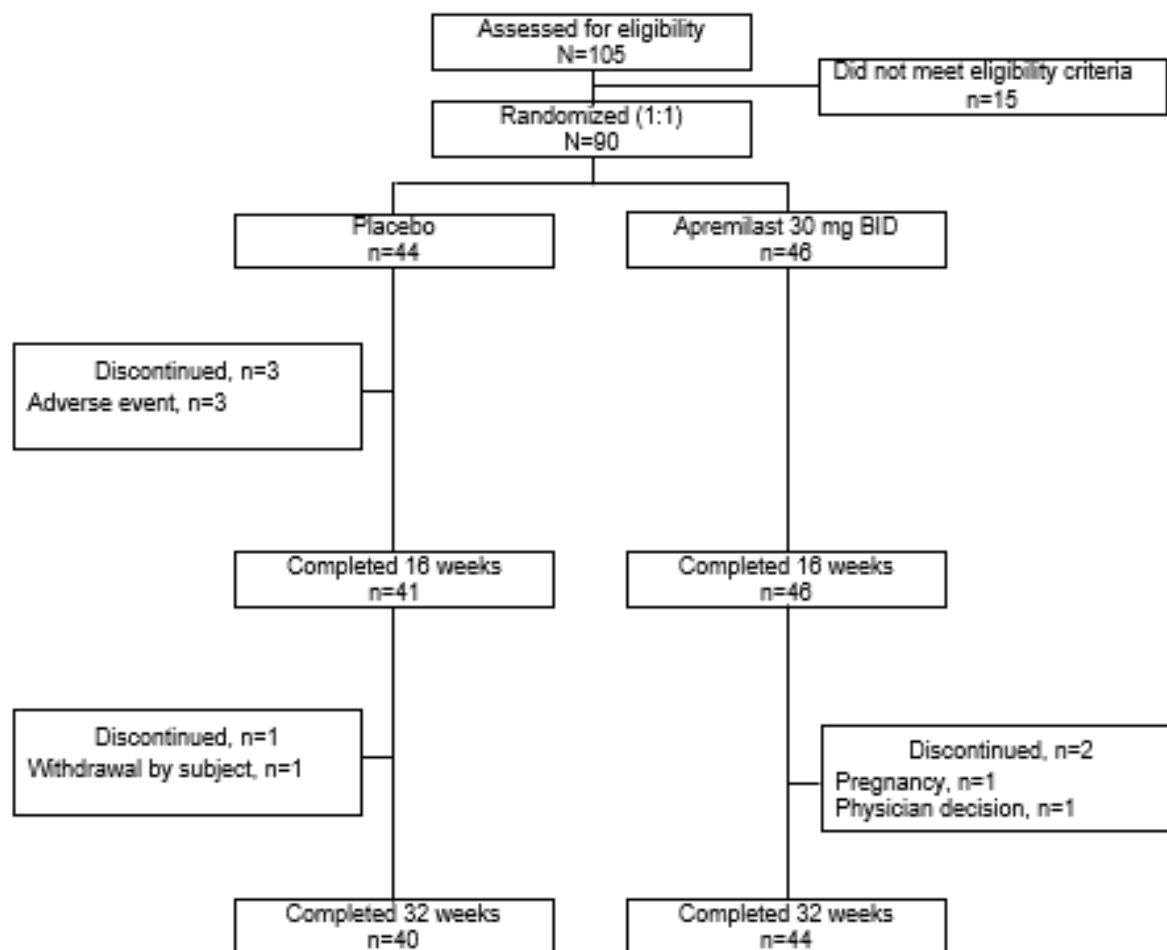

**Online Resource 3. Proportion of Patients at Week 16 With PPPASI-50, PPPASI-75, or PPPASI-90 Response**

| <b>Proportion of Patients</b> | <b>Placebo<br/>N=44<br/>n (%)</b> | <b>Apremilast<br/>N=46<br/>n (%)</b> | <b>Difference in<br/>Proportion %<br/>(95% CI)</b> | <b>Nominal <i>P</i> value</b> |
|-------------------------------|-----------------------------------|--------------------------------------|----------------------------------------------------|-------------------------------|
| PPPASI-50                     | 18 (40.9)                         | 36 (78.3)                            | 37.4 (18.6, 56.1)                                  | 0.0003                        |
| PPPASI-75                     | 7 (15.9)                          | 20 (43.5)                            | 26.3 (8.3, 44.2)                                   | 0.0074                        |
| PPPASI-90                     | 3 (6.8)                           | 6 (13.0)                             | 6.2 (-6.0, 18.5)                                   | 0.3278                        |

Intent-to-treat population. Two-sided CI is based on the Clopper-Pearson method. Two-sided *P* value (nominal) is based on Cochran Mantel-Haenszel test adjusting for baseline PPPASI score range and baseline focal infection status at baseline. Missing data were imputed by nonresponder imputation. CI=confidence interval; PPPASI=Palmoplantar Pustulosis Area and Severity Index; PPPASI-50= $\geq 50\%$  improvement from baseline in PPPASI total score; PPPASI-75= $\geq 75\%$  improvement from baseline in PPPASI total score; PPPASI-90= $\geq 90\%$  improvement from baseline in PPPASI total score. NA=not available

**Online Resource 4. Proportion of Patients With a. PPPASI-50 Response; and b. PPPASI-75 Response Over 32 Weeks**

**a.**

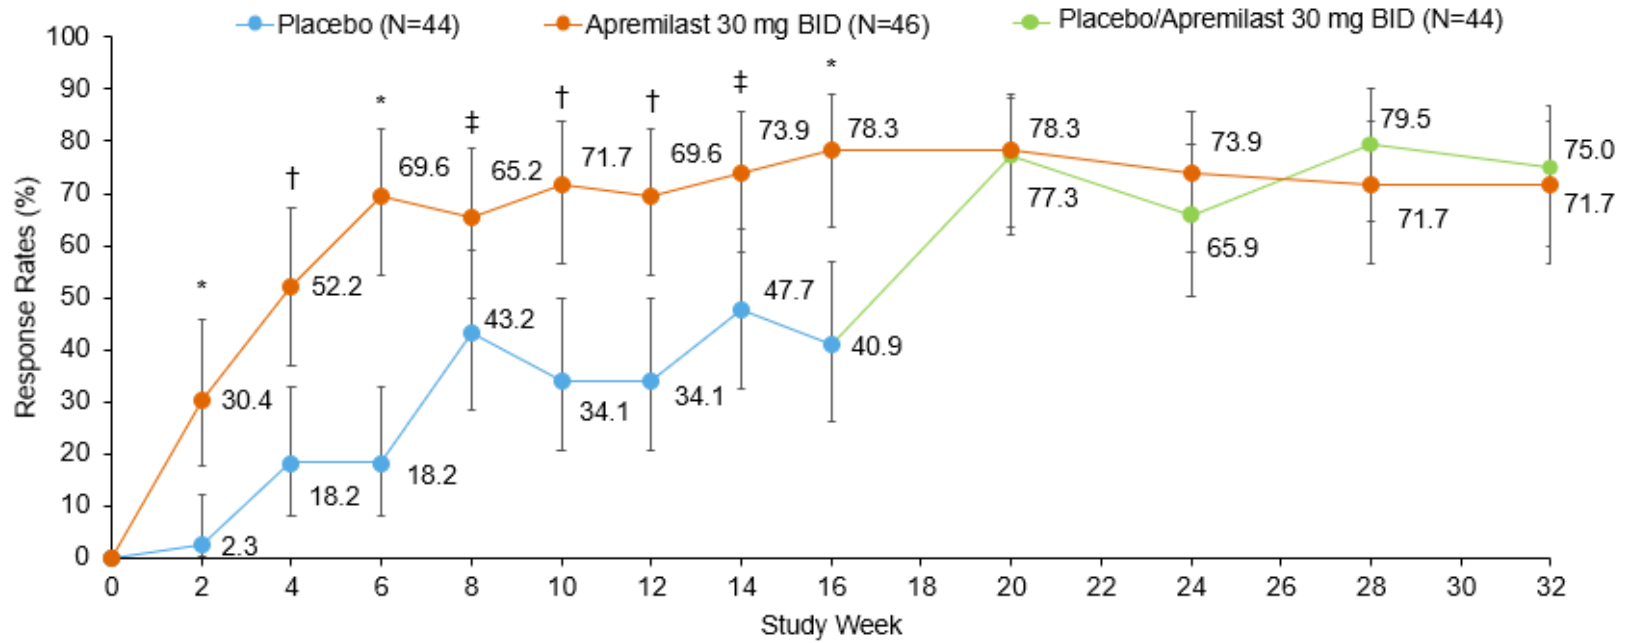

|                 |   |       |       |       |       |       |       |       |       |       |       |       |       |
|-----------------|---|-------|-------|-------|-------|-------|-------|-------|-------|-------|-------|-------|-------|
| Placebo, n/N    | 0 | 1/44  | 8/44  | 8/44  | 19/44 | 15/44 | 15/44 | 21/44 | 18/44 | 34/44 | 29/44 | 35/44 | 33/44 |
| Apremilast, n/N | 0 | 14/46 | 24/46 | 32/46 | 30/46 | 33/46 | 32/46 | 34/46 | 36/46 | 36/46 | 34/46 | 33/46 | 33/46 |

b.

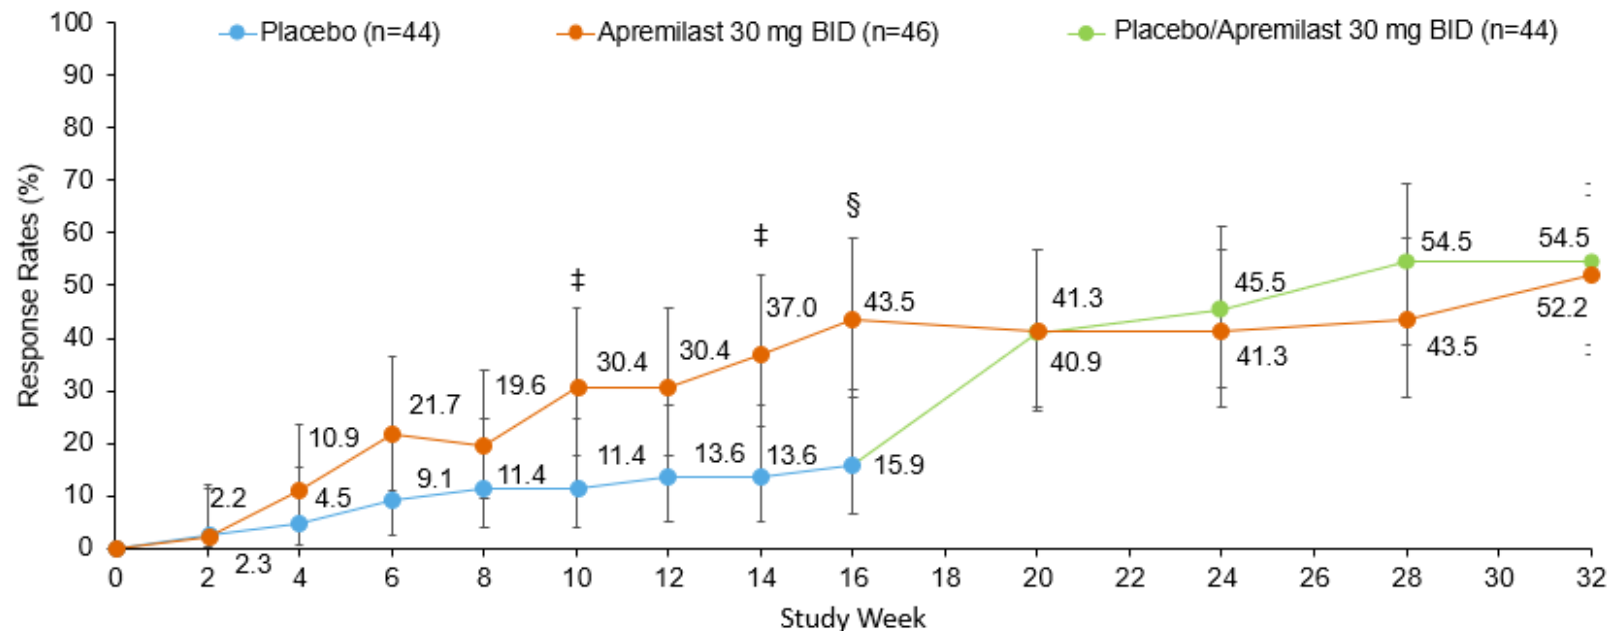

|                 |   |      |      |       |      |       |       |       |       |       |       |       |       |
|-----------------|---|------|------|-------|------|-------|-------|-------|-------|-------|-------|-------|-------|
| Placebo, n/N    | 0 | 1/44 | 2/44 | 4/44  | 5/44 | 5/44  | 6/44  | 6/44  | 7/44  | 18/44 | 20/44 | 24/44 | 24/44 |
| Apremilast, n/N | 0 | 1/46 | 5/46 | 10/46 | 9/46 | 14/46 | 14/46 | 17/46 | 20/46 | 19/46 | 19/46 | 20/46 | 24/46 |

\*Nominal  $P \leq 0.0005$  vs placebo. †Nominal  $P < 0.005$  vs placebo. ‡Nominal  $P < 0.05$  vs placebo. §Nominal  $P = 0.0074$  vs placebo. Intent-to-treat population. Two-sided CI is based on the Clopper-Pearson method. Two-sided  $P$  value (nominal) is based on the Cochran-Mantel-Haenszel test adjusting for baseline PPPASI score range and baseline focal infection status. Missing data were imputed by nonresponder imputation. CI=confidence interval; PPPASI=Palmoplantar Pustulosis Area and Severity Index; PPPASI-50= $\geq 50\%$  improvement from baseline in PPPASI total score; PPPASI-75= $\geq 75\%$  improvement from baseline in PPPASI total score.

**Online Resource 5. Change From Baseline in a. PPPASI; and b. PPSI Score Over Time**

**a.**

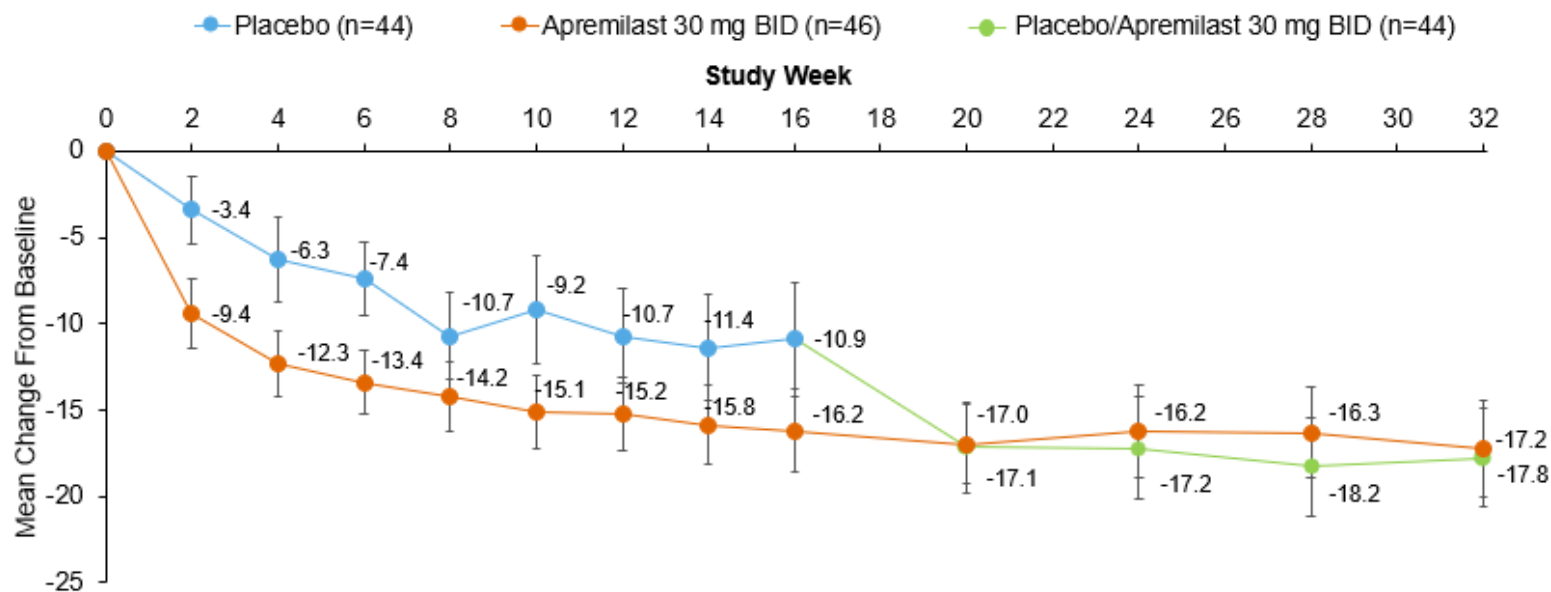

|               |    |    |    |    |    |    |    |    |    |  |    |    |    |    |
|---------------|----|----|----|----|----|----|----|----|----|--|----|----|----|----|
| Placebo, n    | 44 | 44 | 43 | 43 | 43 | 42 | 41 | 41 | 41 |  | 41 | 41 | 41 | 40 |
| Apremilast, n | 46 | 46 | 46 | 46 | 46 | 46 | 46 | 46 | 46 |  | 45 | 45 | 44 | 44 |

Error bars represent 95% CI. Intent-to-treat population.

b.

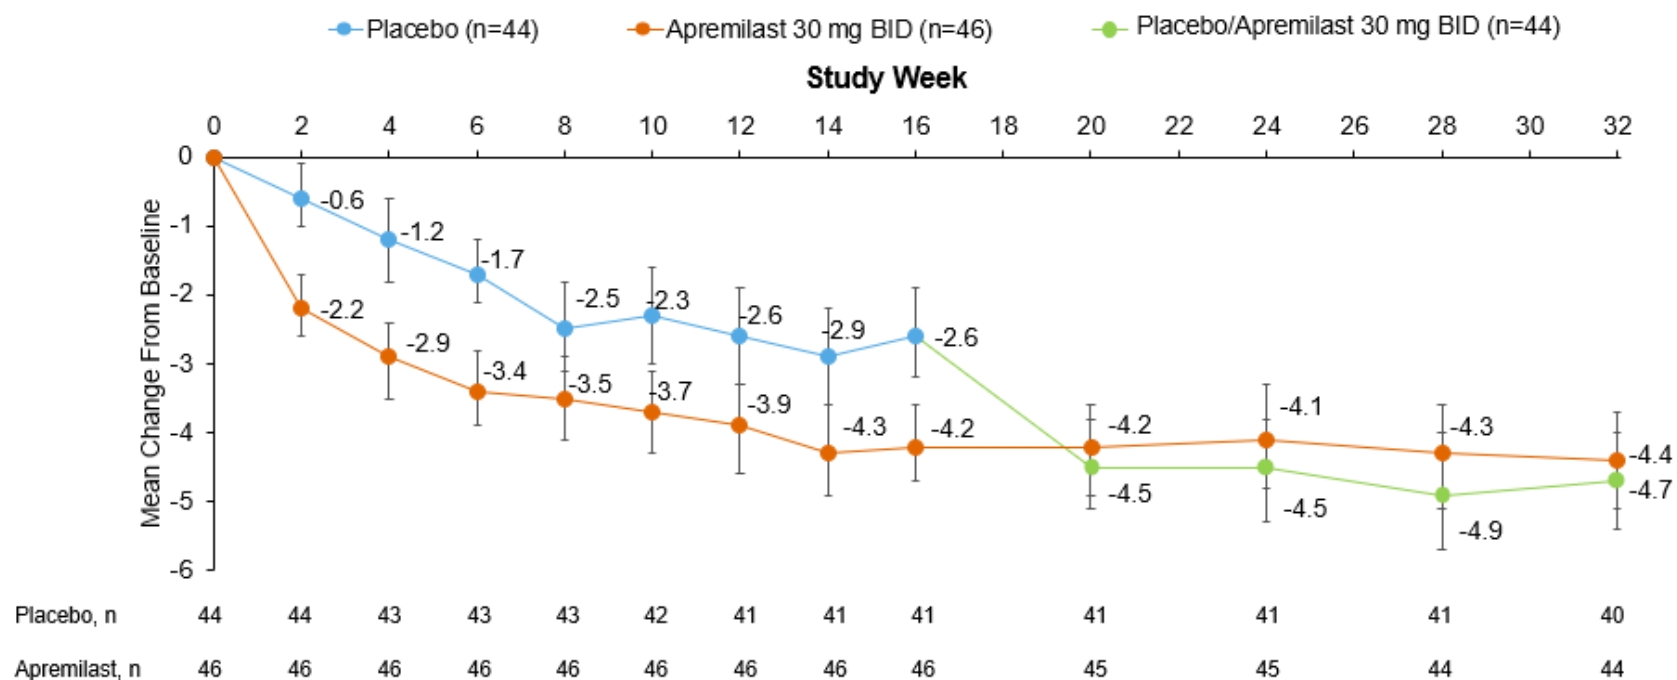

Error bars represent 95% CI. Intent-to-treat population.

CI=confidence interval; PPPASI=Palmoplantar Pustulosis Area and Severity Index; PPSI=Palmoplantar Severity Index.



**Online Resource 6. Change From Baseline in a. Pruritus VAS; and b. Skin Discomfort/Pain VAS Over Time**

**a.**

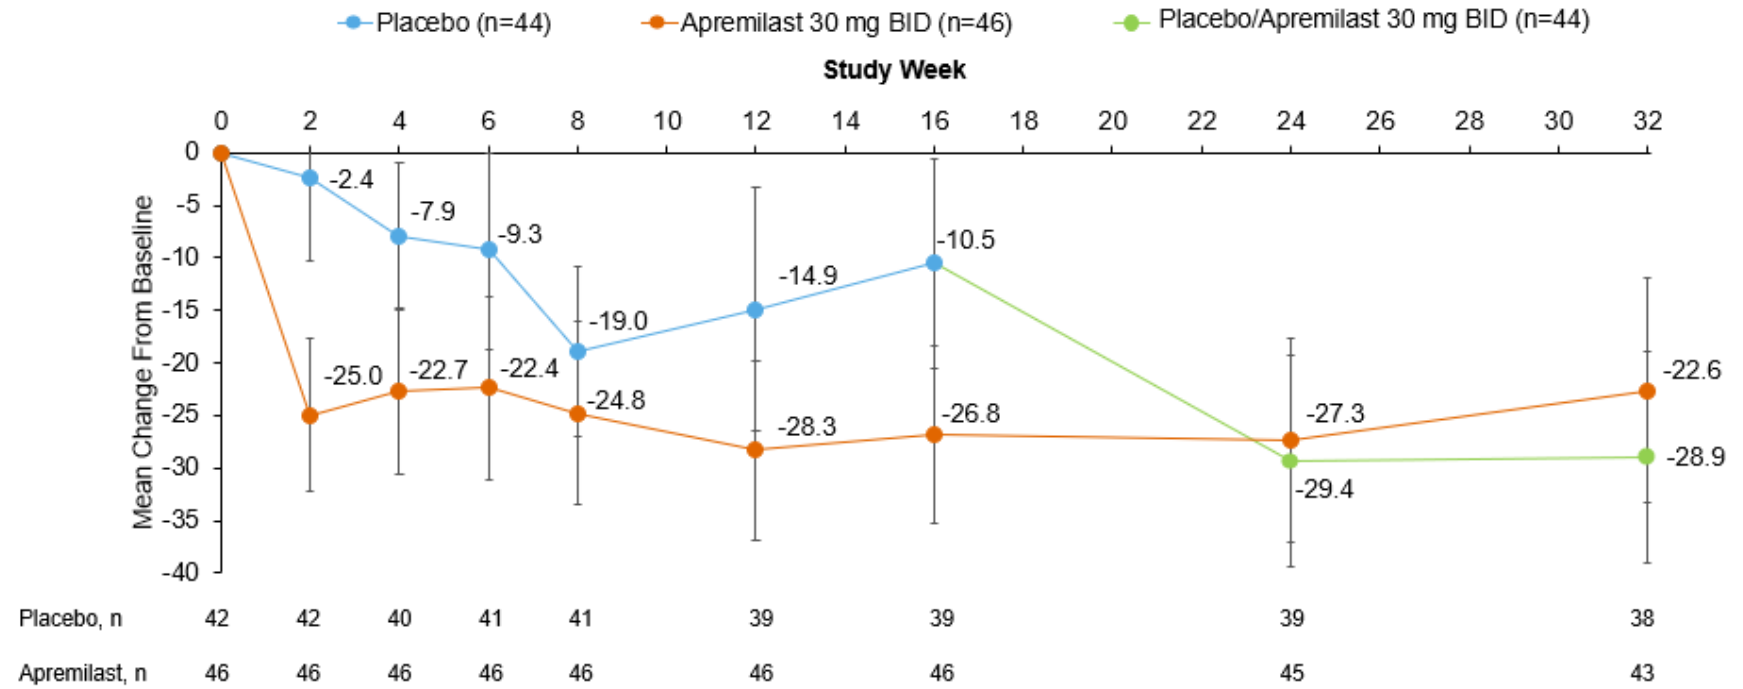

Error bars represent 95% CI. Intent-to-treat population.

CI=confidence interval; VAS=visual analog scale.

b.

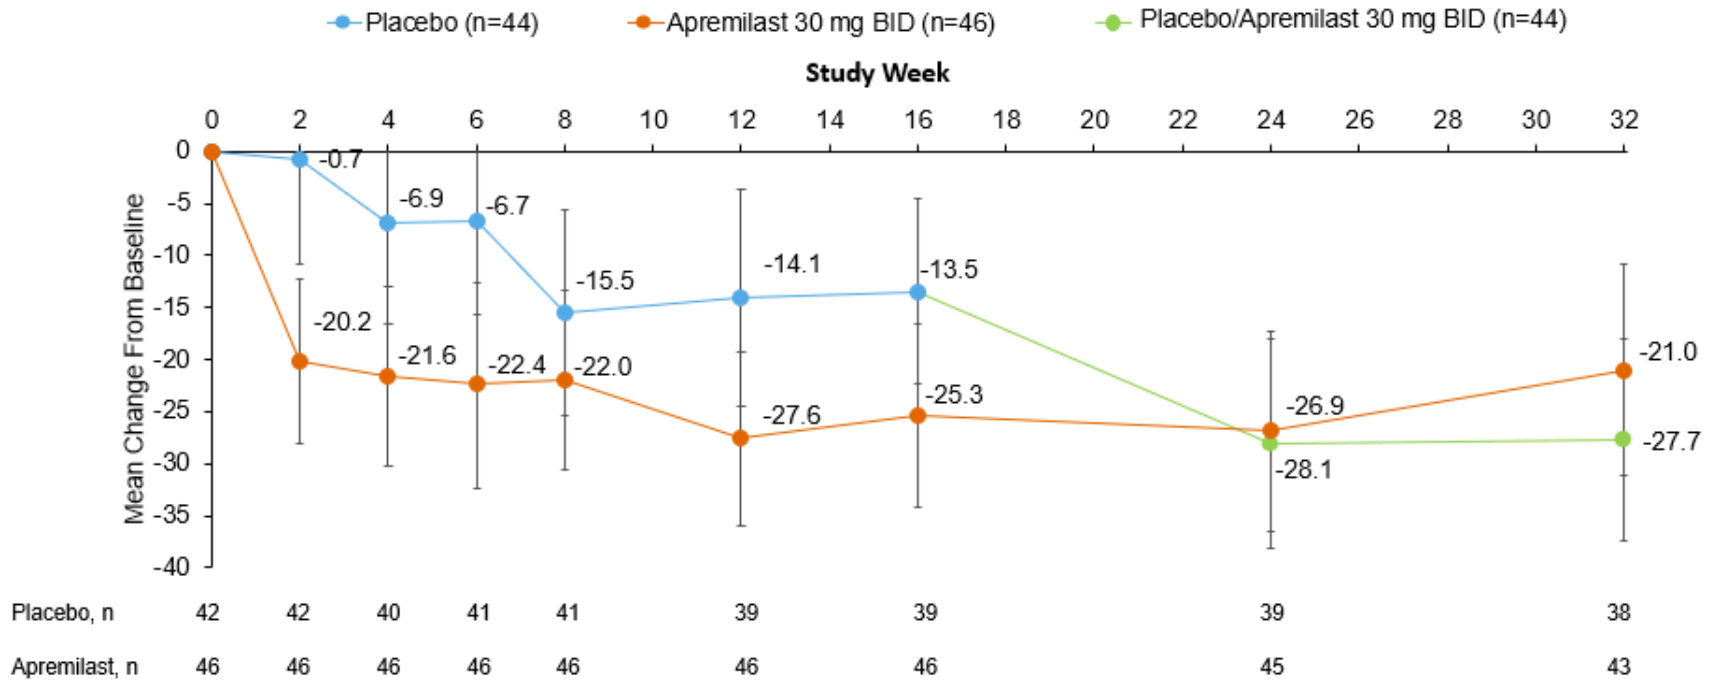

Error bars represent 95% CI. Intent-to-treat population.

CI=confidence interval; VAS=visual analog scale.
